# Supplementary material
Source: PubMed Central journal article supplement (PMC5004713)
Supplement: mol-22-15_240_Guo_Suppl.pdf [file mol-22-15_240_Guo_Suppl.pdf]

Supplemental Data

**A Stromal Cell-Derived Factor 1 $\alpha$  Analogue Improves Endothelial Cell Function in Lipopolysaccharide-Induced Acute Respiratory Distress Syndrome**

Changrun Guo,<sup>1,8</sup> Andrew Goodwin,<sup>2</sup> Joy Buie,<sup>1</sup> James Cook,<sup>1</sup> Perry Halushka,<sup>3,4</sup> Kelley Argraves,<sup>5</sup> Basilia Zingarelli,<sup>6</sup> Xian Zhang,<sup>7</sup> Liping Wang,<sup>8</sup> and Hongkuan Fan<sup>1</sup>

Online address: <http://www.molmed.org>

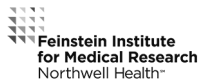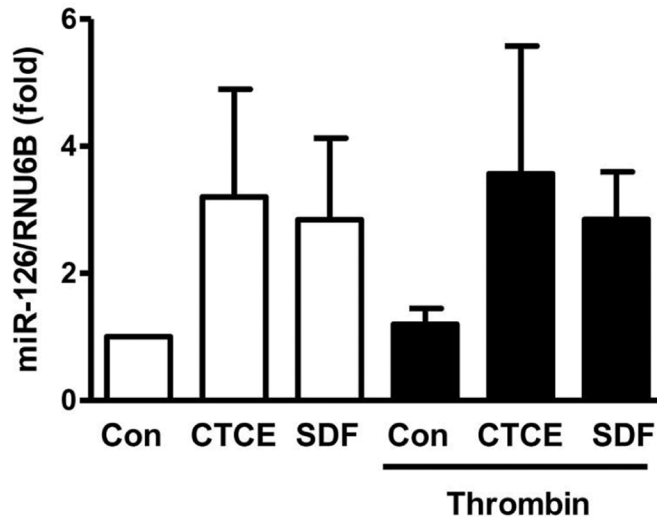

**Supplementary Figure S1.** Effect of SDF-1 $\alpha$ , CTCE and thrombin on miR-126 expression in HMVECs. HMVECs were treated with thrombin (0.01U), SDF-1 $\alpha$  (250 ng/ml), CTCE (10  $\mu$ g/ml) or combination of thrombin with SDF-1 $\alpha$  or CTCE for 2 h. miR-126 expression was determined by real-time PCR. N=5 independent experiments.
